# Supplementary material
Source: Elsevier journal article supplement (https://comptes-rendus.academie-sciences.fr/chimie/article/10.1016/j.crci.2010.04.020/file/attach/mmc1.pdf)

# checkCIF/PLATON report

No syntax errors found. CIF dictionary Interpreting this report

## Datablock: ds\_01t\_compound\_2

---

Bond precision: C-C = 0.0076 Å

Wavelength=0.71073

Cell: a=11.1169(3) b=13.2635(4) c=14.7574(4)  
alpha=89.127(2) beta=84.693(2) gamma=87.350(2)  
Temperature: 100 K

|                        | Calculated      | Reported        |
|------------------------|-----------------|-----------------|
| Volume                 | 2164.19(11)     | 2164.19(11)     |
| Space group            | P -1            | P -1            |
| Hall group             | -P 1            | ?               |
| Moiety formula         | C22 H34 Cl N2 P | C22 H34 Cl N2 P |
| Sum formula            | C22 H34 Cl N2 P | C22 H34 Cl N2 P |
| Mr                     | 392.93          | 392.93          |
| Dx,g cm <sup>-3</sup>  | 1.206           | 1.206           |
| Z                      | 4               | 4               |
| Mu (mm <sup>-1</sup> ) | 0.259           | 0.259           |
| F000                   | 848.0           | 848.0           |
| F000'                  | 849.22          |                 |
| h,k,lmax               | 13,15,17        | 13,15,17        |
| Nref                   | 7644            | 7571            |
| Tmin,Tmax              | 0.969,0.992     |                 |
| Tmin'                  | 0.950           |                 |

Correction method= Not given

Data completeness= 0.990

Theta(max)= 25.030

R(reflections)= 0.0790( 6181)

wR2(reflections)= 0.2122( 7571)

S = 1.158

Npar= 474

---

The following ALERTS were generated. Each ALERT has the format

**test-name\_ALERT\_alert-type\_alert-level.**

Click on the hyperlinks for more details of the test.

---

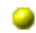

### Alert level C

PLAT340\_ALERT\_3\_C Low Bond Precision on C-C Bonds (x 1000) Ang .. 8  
PLAT480\_ALERT\_4\_C Long H...A H-Bond Reported H19C .. CL1' .. 2.86 Ang.

---

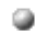

### Alert level G

PLAT083\_ALERT\_2\_G SHELXL Second Parameter in WGHT Unusually Large. 11.28

---

0 **ALERT level A** = In general: serious problem  
0 **ALERT level B** = Potentially serious problem  
2 **ALERT level C** = Check and explain  
2 **ALERT level G** = General alerts; check

1 ALERT type 1 CIF construction/syntax error, inconsistent or missing data  
1 ALERT type 2 Indicator that the structure model may be wrong or deficient  
1 ALERT type 3 Indicator that the structure quality may be low  
1 ALERT type 4 Improvement, methodology, query or suggestion  
0 ALERT type 5 Informative message, check

---

---

### **Publication of your CIF in IUCr journals**

**A basic structural check has been run on your CIF. These basic checks will be run on all CIFs submitted for publication in IUCr journals (*Acta Crystallographica*, *Journal of Applied Crystallography*, *Journal of Synchrotron Radiation*); however, if you intend to submit to *Acta Crystallographica Section C* or *E*, you should make sure that full publication checks are run on the final version of your CIF prior to submission.**

### **Publication of your CIF in other journals**

**Please refer to the *Notes for Authors* of the relevant journal for any special instructions relating to CIF submission.**

---

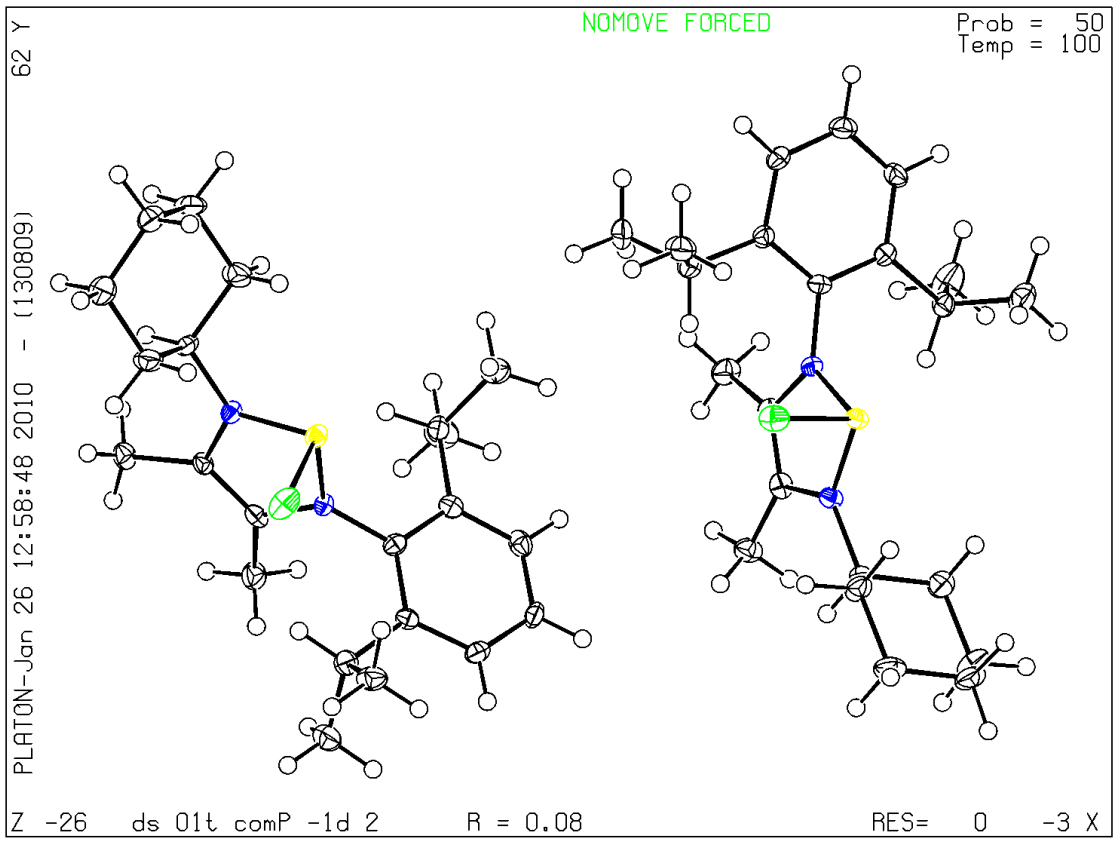

Supplement: mmc1 [file mmc1.pdf]
